# Supplementary material for: A Pilot Feasibility Study of teaching focused cardiac ultrasound to Australian medical students in a structured program
Source: Research Square preprint supplement (doi:10.21203/rs.3.rs-6771448/v1), 2025-07-01
Supplement: Supplementary file 1 [file 90e78e76a073d4dcdc5d3b7c.pdf]

# Appendices Table of Contents:

---

|            |         |                                                                                      |
|------------|---------|--------------------------------------------------------------------------------------|
| Appendix 1 | Page 2  | Medical Student Echo Learning Compendium<br>Including Course structure and timetable |
| Appendix 2 | Page 26 | Links to online videos                                                               |
| Appendix 3 | Page 28 | Student report Proforma                                                              |
| Appendix 4 | Page 29 | Mixed Methods Survey                                                                 |
|            | Page 31 |                                                                                      |

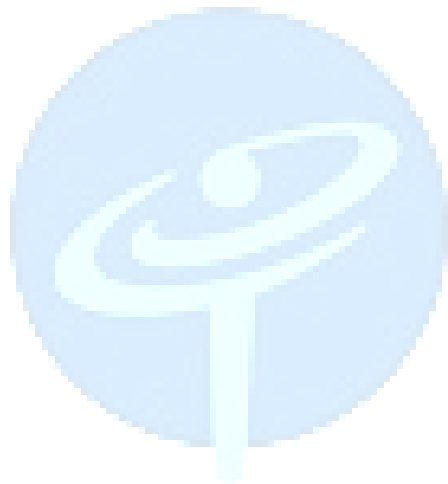

Epworth

# EPWORTH MEDICAL STUDENT ECHOCARDIOGRAPHY LEARNING COMPENDIUM

---

**Name:**.....



Epworth

## Table of Contents:

|                  |        |
|------------------|--------|
| Online Resources | 3      |
| Lesson Plans     | 4 - 20 |



Epworth

## Online Resources:

<https://aseuniversity.org/ase/activities/46>

This site is free but you will need to create a login.

This contains high quality videos and online MCQs

<http://www.echoclass101.com/?cat=64>

- The section on basic anatomy of the heart is a great starting point

[http://pie.med.utoronto.ca/TTE/TTE\\_content/standardViews.html](http://pie.med.utoronto.ca/TTE/TTE_content/standardViews.html)

- This is like having your own echo simulator at home!

<https://www.ultrasoundtraining.com.au/foamus/foamus-free-ebooks>

- Lots of free e-books on here which are great for those who want to do further learning

<http://intensiveblog.com/category/echo-and-ultrasound/>

- The level I echo video and ultrasound principles videos are a great resource.

# Lesson Plan

---

## Week 1

**Title:** Parasternal views

**Learning objectives:**

- 1) Understand how to position the probe to obtain the first standard views including:

Parasternal long axis

RV inflow view

RV outflow view

Parasternal short axis views - base, "fish mouth", mid papillary and apex

- 2) Understand the Sonoanatomy of

Left ventricle

Aortic valve

Mitral valve

Tricuspid valve

**Format:**

Vimedix simulator

Brief demonstration to group then each student obtains the views above

Students not scanning are quizzed on Sonoanatomy

**Group Size:**

Up to 4

**Pre reading:**

<https://drive.google.com/open?id=17pcyjtCvhygmA4aPLrdZbg5a79ISxYS>

Completed:

Student

Supervisor

# Lesson Plan

---

## Week 2

**Title:** Artifacts and their origins & Apical Views

**Learning objectives:**

- 1) Understand how to position the probe to obtain the standard apical views including:

- Apical 4 Chamber
- Apical 5 Chamber
- Apical 2 Chamber
- Apical long axis (3 Chamber)

- 2) Understand the sonoanatomy of

- Left ventricle and right ventricle
- Left and right atria
- Aortic valve
- Mitral valve
- Tricuspid valve

**Format:**

Vimedix simulator

Brief demonstration to group then each student obtains the views above

Students not scanning are quizzed on sonoanatomy

**Group Size:**

Up to 4

**Pre reading:**

[https://drive.google.com/open?id=1xZMurH2fApvz5UH\\_mCFnhZBZPN0EPW3-](https://drive.google.com/open?id=1xZMurH2fApvz5UH_mCFnhZBZPN0EPW3-)

<https://www.dropbox.com/s/dquem65f62apq0o/Introduction%20to%20TTE%20Susanna%20Price.pdf?dl=0>

Completed:

Student

Supervisor

# Lesson Plan

---

## Week 3

**Title:** Subcostal Views

**Learning objectives:**

- 1) Understand how to position the probe to obtain the basic subcostal views
  - Subcostal four chamber
  - Subcostal SAX chamber views of the LV
  - IVC

- 2) Understand the Sonoanatomy of:

The inferior Vena Cava and the right atrium

Interatrial septum

The hepatic vein

The abdominal aorta

**Format:**

Vimedix simulator

Brief demonstration to group then each student obtains the views above

Students not scanning are quizzed on sonoanatomy

**Group Size:** Up to 4

**Pre reading:**

<https://vimeo.com/120316428>

[https://drive.google.com/open?id=1MKhwxS3q5y6Vr\\_OZypTbwXS\\_w-U06vol](https://drive.google.com/open?id=1MKhwxS3q5y6Vr_OZypTbwXS_w-U06vol)

Completed:

Student

Supervisor



Epworth

# Lesson Plan

---

**Week 4/5**

**Title:** Peer Volunteer Scanning

**Learning objectives:**

- 1) Learn to obtain all the standard views practiced on the simulator on alive human model
- 2) Learn work-arounds and alternatives where views are difficult

**Format:**

Practical session scanning other registrars

Scans are recorded into logbook

**Group Size:**

Up to 4

**Pre reading:**

<https://www.dropbox.com/s/3e63jn3e5o6eomt/Walley-A%20practical%20approach%20to%20goal-directedechocardiography%20in%20the%20critical%20care%20setting.pdf?dl=0>

**Completed:**

Student

Supervisor

.....

.....

# Lesson Plan

---

## Week 6

**Title:** Assessing LV function by eyeball method

**Learning objectives:**

- 1) Understand the definition of contractility and its measurement
- 2) Demonstrate the ability to use VEM to follow the endocardium through the cardiac cycle

**Format:**

Live scanning of real patients in small groups on the ward

**Group Size:**

Up to 4 per instructor

**Pre reading:**

<https://drive.google.com/open?id=1zaQMbXbATH4M801v9wKZCM8faBZ9kHk7>

<https://drive.google.com/open?id=1h6qP533D2VjgZWILCNon7he9F3v30LBQ>

<https://drive.google.com/open?id=1btEf6APm96hhCJgEuwa5aY592EVfF4x1>

[https://drive.google.com/open?id=13Qlodc2tm6OveiWk\\_Zk9NMge2\\_5GNP5G](https://drive.google.com/open?id=13Qlodc2tm6OveiWk_Zk9NMge2_5GNP5G)

<https://drive.google.com/open?id=18qC1IM3DmFo0F3CzOC7ktEHcOmrqzQsK>

<https://drive.google.com/open?id=1X87Nv1LTDAJ0cMpo3dcRYCFYI6kpZqiT>

Completed:

Student

Supervisor

.....

.....

# Lesson Plan

---

**Week 7**

**Title:** Introduction to Doppler

**Learning objectives:**

- 1) Understand the Doppler principle
- 2) Demonstrate the use of colour Doppler in the Parasternal views

**Format:**

Live scanning on patients in ICU or CCU

**Group Size:**

**Up to 2**

**Pre reading:**

<https://drive.google.com/open?id=0B93QsjVQISuJWWIEaWVCY2VHX1E>

Completed:

Student

Supervisor

# Lesson Plan

---

**Week 8**

**Tile:** Apical Doppler

**Learning objectives:**

- 1) Demonstrate the use of colour and spectral Doppler in the Apical views with the CX-50

**Format:**

Live scanning on patients in ICU or CCU

**Group Size:**

Up to 2

**Pre reading:**

<https://drive.google.com/open?id=1PovConZAxxFaeQKhK0GRr84i2qL0F831>

Completed:

Student

Supervisor

Epworth

# Lesson Plan

---

**Week 9**

**Tile:** Subcostal Doppler

**Learning objectives:**

- 1) Demonstrate the use of colour and spectral Doppler in the subcostal views with the CX-50
- 2) Understand the value of screening valves for pathology in ICU

**Format:**

Live scanning on patients in ICU or CCU

**Group Size:**

Up to 2

**Pre reading:**

<https://drive.google.com/open?id=1GS8v7sch7z0BH91HNcRleiGtSzigdSBj>

Completed:

Student

Supervisor

# Lesson Plan

---

**Week 10**

**Title:** Complete Doppler examination

**Learning objectives:**

- 1) Demonstrate a Level 1 echo with the CX-50
- 2) Understand the basics of the Doppler principles involved

**Format:**

Live scanning on patients in ICU and CCU

**Group Size:**

Up to 2

**Pre reading:**

[https://youtu.be/hqZ\\_Zx59Uvo](https://youtu.be/hqZ_Zx59Uvo)

<https://drive.google.com/open?id=1cIOJB-w66PvSX96SEIBKSG8fkdRfsVPh>

Completed:

Student

Supervisor

# Lesson Plan

---

## Week 11

**Tile:** 2D Measurements

### Learning objectives:

- 1) Learn how to perform basic 2D and M-mode measurements in the parasternal, apical and subcostal windows:

|                   |                                                     |
|-------------------|-----------------------------------------------------|
| Parasternal LAX:  | LVOT diameter, LVIDd                                |
| Apical 4 Chamber: | TAPSE (M-mode)                                      |
| Subcostal SAX:    | IVC diameter and collapsibility (2D and/or M-mode). |

- 2) Demonstrate 2D/m-mode measurements in a bedside echo assessment

### Format:

Live scanning on patients in ICU and CCU

### Group Size:

Up to 2

### Pre reading:

Completed:

Student

Supervisor

.....

.....

# Lesson Plan

---

## Week 12

**Tile:** Aortic valve

### Learning objectives:

- 1) Understand aortic valve structure and pathologies, including:
  - Congenital and acquired stenosis (bicuspid AoV, age related degeneration)
  - Aortic regurgitation
- 2) Learn how to assess the aortic valve using 2D and Doppler techniques:
  - Maximal aortic cusp separation (MACS) using M-mode
  - Colour and spectral Doppler

### Format:

Live scanning on patients in ICU and CCU

### Group Size:

Up to 2

### Pre reading:

<https://drive.google.com/open?id=1T1wFPAGDVqt7RRtH4aGgsgxZDbsBPXh>

### Completed:

Student

Supervisor

.....

.....

# Lesson Plan

---

## Week 13

**Title:** Mitral Valve

**Learning objectives:**

- 1) Understand mitral valve structure and pathologies including acquired stenosis and regurgitation.
  - Stenosis: Mitral annular calcification, Rheumatic mitral disease
  - Mitral Regurgitation: functional, prolapse, flail, "SAM", endocarditis
- 2) Learn how to assess the mitral valve using 2D/M-mode and Doppler techniques

**Format:**

Live scanning on patients in ICU and CCU

**Group Size:**

Up to 2

**Pre reading:**

<https://drive.google.com/open?id=15wk7azjJFb98XIFrJMT9ZSBbmZrkQ22E>

Completed:

Student

Supervisor

.....

.....

# Lesson Plan

---

## Week 14

**Tile:** Tricuspid Valve and Pulmonary pressures

**Learning objectives:**

- 1) Understand tricuspid valve structure and pathologies including:
  - Functional tricuspid regurgitation
  - Ebstein's anomaly
  - Rheumatic tricuspid disease (in association with mitral valve involvement)
  - Carcinoid heart disease
- 2) Learn how to assess the tricuspid valve using 2D and Doppler techniques
- 3) Learn how to measure RV and PA systolic pressure from the TR spectral Doppler signal

**Format:**

Live scanning on patients in ICU and CCU

**Group Size:**

Up to 2

**Pre reading:**

<https://vimeo.com/119991183>

Completed:

Student

Supervisor

.....

.....

# Lesson Plan

---

## Week 15

**Tile:** Pulmonary Valve and Pulmonary pressures

**Learning objectives:**

- 1) Understand pulmonary valve structure and pathology:
  - Congenital pulmonary stenosis
  - Pulmonary homograft/allograft
  - Pulmonary regurgitation
- 2) Learn how to assess the pulmonary valve using 2D and Doppler techniques
- 3) Learn how to measure PA Acceleration Time (PAAT), mean PA pressure (mPAP) and PAEDP from the PR spectral Doppler signal

**Format:**

Live scanning on patients in ICU and CCU

**Group Size:**

Up to 2

**Pre reading:**

<https://vimeo.com/119991183>

Completed:

Student

Supervisor

.....

.....

# Lesson Plan

---

## Week 16

**Title:** Pericardial Effusion and Tamponade

**Learning objectives:**

- 1) Identify and differentiate a pericardial effusion from a pleural effusion and ascites using all imaging windows
- 2) Establish the qualitative size and distribution of a pericardial effusion
- 3) Use 2D and spectral Doppler to confirm the clinical diagnosis of tamponade

**Format:**

Vimedix simulator

Live scanning on patients in ICU and CCU

**Group Size:**

Up to 2

**Pre reading:**

Completed:

Student

Supervisor

# Lesson Plan

---

**Week 17**

**Title:** Hypovolaemia

**Learning objectives:**

- 1) Learn to assess a patient's volume state using 2D/M-mode (LVlDd, IVC size and collapsibility)
- 2) Understand the limitations of the IVC assessment in mechanical ventilation.

**Format:**

Live scanning on patients in ICU and CCU

**Group Size:**

Up to 2

**Pre reading:**

<https://intensiveblog.com/level-1-echo/>

Completed:

Student

Supervisor

Epworth

# Lesson Plan

---

## Week 18

**Title:** Pulmonary Embolus and Right Heart Failure

**Learning objectives:**

- 1) Identify the echocardiographic signs of pulmonary embolus from all available views including:
  - 3) RV dilatation
  - 4) McConnell's sign
  - 5) Saddle embolus
- 2) Differentiate normal RV size and systolic function from abnormal (RV linear measurements, visual estimate)
- 3) Revise the measurement techniques to estimate pulmonary pressures.

**Format:**

Vimedix simulator

Live scanning on patients in ICU and CCU

**Group Size:**

Up to 2

**Pre reading:**

Completed:

Student

Supervisor

## Medical Student Echo Teaching Timetable.

| Week Commencing | Learning Activities                                                                                                                  | Learning Objectives                                                                                                                                                                                                   |
|-----------------|--------------------------------------------------------------------------------------------------------------------------------------|-----------------------------------------------------------------------------------------------------------------------------------------------------------------------------------------------------------------------|
| 3rd April       | Introduction Lecture<br>-Monday 3 <sup>rd</sup> April                                                                                | -Understand the outline, requirements and objectives of the Epworth Medical Student Echo Course<br>-Introduction to the Vimedix Echo Simulator                                                                        |
| 10 April        | <b>Online lectures</b><br>Introduction to soundwaves<br>Parasternal views<br><b>Hands on practice</b><br>Vimedix with Dr Kyle Brooks | -Understand the basic concepts of ultrasound and its interaction with human tissue as well as image formation.<br>-Learn the cardiac anatomy seen in parasternal long and short axes.<br>-Practice image acquisition. |
| 24 April        | <b>Online lectures</b><br>Introduction to artefacts<br>Apical views<br><b>Hands on practice</b><br>Vimedix with Dr Kyle Brooks       | -Understand the basic concepts of artefacts and their origins.<br>-Learn the cardiac anatomy seen in Apical views.<br>-Practice image acquisition.                                                                    |
| 01 May          | <b>Online lectures</b><br>CX-50 Knobology and machine Care<br>Subcostal views<br><b>Hands on practice</b><br>Vimedix                 | -Learn the cardiac anatomy seen in Subcostal views.<br>-Learn how to operate the Phillips CX-50 portable echo unit in a safe and effective manner.<br>-Practice image acquisition                                     |
| 8 May           | Attendance in Echo Lab<br><b>Hands on practice</b><br>Karen Scholz Monday and Wednesday by appointment.                              | -Begin to practice image acquisition on live patients.<br>-Observe expert echocardiographers performing image acquisition on real patients                                                                            |
| 15 May          | Attendance in Echo Lab<br><b>Hands on practice</b><br>Karen Scholz Monday and Wednesday by appointment.                              | -Further practice image acquisition on live patients.<br>-Observe expert echocardiographers Performing image acquisition on real patients                                                                             |
| 22 May          | <b>Online lectures</b><br>Doppler physics and parasternal views                                                                      | -Learn to use colour and spectral doppler in the parasternal views.                                                                                                                                                   |

|           |                                                                                                                                                                          |                                                                                                                                                                                 |
|-----------|--------------------------------------------------------------------------------------------------------------------------------------------------------------------------|---------------------------------------------------------------------------------------------------------------------------------------------------------------------------------|
|           | <b>Hands on practice</b><br>Karen Scholz Monday and Wednesday by appointment.                                                                                            | -Begin to understand the physics of the various doppler modes.<br>-Learn the skills necessary to assess valves                                                                  |
| 19 May    | <b>Online lectures</b><br>Doppler physics and Apical views (Spectral Doppler artefacts)<br><b>Hands on practice</b><br>Karen Scholz Monday and Wednesday by appointment. | -Learn to use colour and spectral doppler in the Apical views.<br>-Further understand the physics of the various doppler modes.<br>-Learn the skills necessary to assess valves |
| 05 Jun    | <b>Online lectures</b><br>Doppler subcostal (Colour Doppler artefacts)<br><b>Hands on practice</b><br>Karen Scholz Monday and Wednesday by appointment.                  | -Learn to use colour and spectral doppler in the Apical views.<br>-Further understand the physics of the various doppler modes.<br>-Learn the skills necessary to assess valves |
| 03 July   | Begin independent practice<br><b>Hands on practice</b><br>Karen Scholz Monday and Wednesday by appointment.                                                              | -Learn the skills necessary to perform a complete bedside echo assessment at a medical student level.<br>-Begin recording the 30 scan logbook.                                  |
| 10 July   | <b>Online lectures</b><br>Assessment of LV function<br><b>Hands on practice</b><br>Karen Scholz Monday and Wednesday by appointment.                                     | -Learn to assess LV function by eyeball method using an online video library.<br>Continue recording the 30 scan logbook.                                                        |
| 17 July   | <b>Online lectures</b><br>Aortic Valve pathology<br><b>Hands on practice</b><br>Karen Scholz Monday and Wednesday by appointment.                                        | -Learn to assess the aortic valve using 2D and doppler techniques.<br>-Continue recording the 30 scan logbook.                                                                  |
| 24 July   | <b>Online lectures</b><br>Mitral Valve pathology<br><b>Hands on practice</b><br>Karen Scholz Monday and Wednesday by appointment.                                        | -Learn to assess the mitral valve using 2D and doppler techniques.<br>-Continue recording the 30 scan logbook                                                                   |
| 31 July   | <b>Online lectures</b><br>Tricuspid valve pathology and pulmonary pressures<br><b>Hands on practice</b><br>Karen Scholz Monday and Wednesday by appointment.             | -Learn to assess the tricuspid valve using 2D and doppler techniques.<br>-Continue recording the 30 scan logbook                                                                |
| 07 August | <b>Online lectures</b><br>pulmonary valve pathology and pulmonary pressures<br><b>Hands on practice</b><br>Karen Scholz Monday and Wednesday by appointment.             | -Learn to assess the pulmonary valve using 2D and doppler techniques.<br>-Continue recording the 30 scan logbook                                                                |
| 14 August | <b>Online lectures</b><br>Pericardial effusion and tamponade<br><b>Hands on practice</b>                                                                                 | -Learn to assess the pericardium and differentiate pleural and pericardial effusions.<br>-Continue recording the 30 scan logbook                                                |

|              |                                                                                                                                             |                                                                                                                                                        |
|--------------|---------------------------------------------------------------------------------------------------------------------------------------------|--------------------------------------------------------------------------------------------------------------------------------------------------------|
|              | Karen Scholz Monday and Wednesday by appointment.                                                                                           |                                                                                                                                                        |
| 21 August    | <b>Online lectures</b><br>Hypovolaemia<br><b>Hands on practice</b><br>Karen Scholz Monday and Wednesday by appointment.                     | -Learn to assess the patients volume state.<br>-Continue recording the 30 scan logbook                                                                 |
| 28 August    | <b>Online lectures</b><br>PE and Right Heart Failure<br><b>Hands on practice</b><br>Karen Scholz Monday and Wednesday by appointment.       | -Learn to assess for echo signs of pulmonary embolus.<br>-Continue recording the 30 scan logbook                                                       |
| 04 September | <b>Online lectures</b><br>Advanced artefact interpretation<br><b>Hands on practice</b><br>Karen Scholz Monday and Wednesday by appointment. | -Learn to interpret complex artefacts and begin to understand the limitations of bedside echocardiography.<br>-Continue recording the 30 scan logbook  |
| 11 September | <b>Online lectures</b><br>Limitations of bedside echo<br><b>Hands on practice</b><br>Karen Scholz Monday and Wednesday by appointment.      | -Learn to interpret complex artefacts and begin to understand the limitations of bedside echocardiography.<br>-Continue recording the 30 scan logbook. |

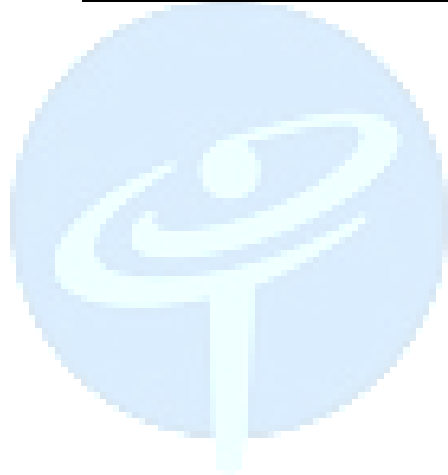

Epworth

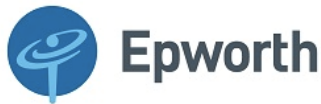

### **Appendix 3. Links to online videos**

#### **Online e-books:**

<https://www.ultrasoundtraining.com.au/foamus/foamus-free-ebooks>

#### **Overview of basic views:**

<https://drive.google.com/open?id=0B93QsjVQISuJMjZiNUY5QmpvSlk>

#### **Parasternal Views:**

<https://drive.google.com/open?id=17pcyjtCvhyqmA4aPLrldZbg5a79ISxYS>

#### **Apical Views:**

[https://drive.google.com/open?id=1xZMurH2fApvz5UH\\_mCFnhZBZPN0EPW3-](https://drive.google.com/open?id=1xZMurH2fApvz5UH_mCFnhZBZPN0EPW3-)

#### **Subcostal Views:**

<https://vimeo.com/120316428>

[https://drive.google.com/open?id=1MKhwxS3q5y6Vr\\_OZypTbwXS\\_w-U06vol](https://drive.google.com/open?id=1MKhwxS3q5y6Vr_OZypTbwXS_w-U06vol)

#### **LV function Assessment:**

[https://drive.google.com/open?id=1G2Wd\\_7TBtSYFm3zkDmJExRMoMYhT4IYS](https://drive.google.com/open?id=1G2Wd_7TBtSYFm3zkDmJExRMoMYhT4IYS)

[https://drive.google.com/open?id=1jnzZthGWi\\_y26t6xysizSXFyEFZM2Jfp](https://drive.google.com/open?id=1jnzZthGWi_y26t6xysizSXFyEFZM2Jfp)

<https://drive.google.com/open?id=1bF1RqVaN6NeMWZMNEXJ8kcOgNXbJDVs8>

<https://drive.google.com/open?id=1ulJetplr-T6z0tq1ETEYOEnTBJFtaODy>

[https://drive.google.com/open?id=1oNOQHNYojNOeRV\\_LqCY\\_gnKkO9jtNc4u](https://drive.google.com/open?id=1oNOQHNYojNOeRV_LqCY_gnKkO9jtNc4u)

<https://drive.google.com/open?id=1X87Nv1LTDAJ0cMpo3dcRYCFYI6kpZqiT>

#### **Introduction to Doppler:**

<https://drive.google.com/open?id=0B93QsjVQISuJWWIEaWVCY2VHX1E>

#### **Apical Doppler:**

<https://drive.google.com/open?id=1PovConZAxXFaEQKhK0GRr84i2qL0F831>

#### **Subcostal Doppler:**

Developed by Dr Kyle Brooks, Dr Katrina Timmins and Ms Karen Scholz.

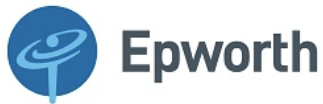

<https://drive.google.com/open?id=1GS8v7scH7z0BH91HNcRleiGtSzjgdSBj>

**Overview of valvular assessment:**

[https://youtu.be/hqZ\\_Zx59Uvo](https://youtu.be/hqZ_Zx59Uvo)

<https://drive.google.com/open?id=1cl0JB-w66PvSX96SEIBKSG8fkdRfsVPh>

<https://drive.google.com/open?id=1GS8v7scH7z0BH91HNcRleiGtSzjgdSBj>

**Assessment of the Aortic Valve:**

<https://drive.google.com/open?id=1T1wFPAGDVqt7RRtH4aGgsgxZDbsBPXh>

**Assessment of the Mitral Valve:**

<https://drive.google.com/open?id=15wk7azjFb98XIFrJMT9ZSBbmZrkQ22E>

**Assessment of the Tricuspid valve:**

<https://vimeo.com/119991183>

**Review:**

<https://intensiveblog.com/level-1-echo/>

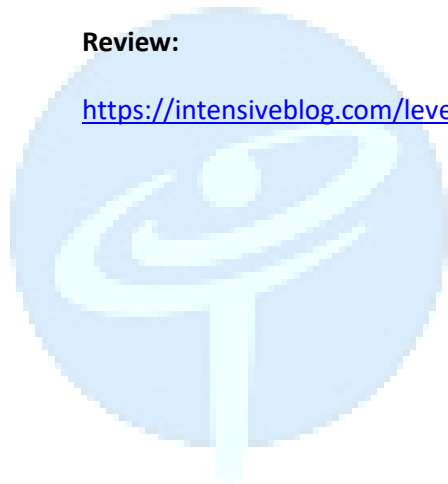

Epworth

# Medical Student Echo Report Proforma

Study Number: .....

Patient Identifier: .....

Student Identifier: .....

 LV function:                      Normal                      Or                      Impaired                      Mild                      Moderate                      Severe

 Pericardial Effusion:           Absent                      Or                      Present - Record depth in diastole .....

 RV:LV size ration:              Normal (LV>RV in A4c view)                      or                      Abnormal (RV>LV in A4C view)

Valves:

Mitral                      Normal or only mildly impaired.

Or

&gt; Mild Regurgitation           Jet area % of LA .....%

Vena Contracta Width .....

&gt; Mild Stenosis                      Mean Gradient .....mmHg                      Pressure ½ time.....mSec

Valve replacement in situ

Aortic                      Normal or only mildly impaired.

Or

&gt; Mild Regurgitation           Jet height % of LVOT.....%

Vena Contracta .....mm

&gt; Mild Stenosis                      Peak Velocity .....m/sec

Valve replacement in situ

Tricuspid                      Normal or only mildly impaired.

Or

&gt; Mild Regurgitation           Jet area .....cm                      Vena contracta Width .....mm

&gt; Mild Stenosis                      Mean Gradient .....mmHg                      Pressure ½ time.....mSec

Valve replacement in situ

TR Vmax .....

Pulmonary                      Normal or only mildly impaired.

Or

&gt; Mild Regurgitation

&gt; Mild Stenosis

Valve replacement in situ

**Grading Guide:**

Mitral

&gt; Mild Regurgitation           Jet area % of LA 20%                      Vena contracta Width           &gt; 3mm

&gt; Mild Stenosis                      Mean Gradient           &gt; 5mmHg                      Pressure ½ time           &gt;140mSec

Aortic                      &gt; Mild Regurgitation           Jet height % of LVOT           &gt;25%                      Vena Contracta &gt;3mm

&gt; Mild Stenosis                      Peak Velocity           &gt;3m/sec

Valve replacement in situ

Pulmonary                      &gt; Mild Regurgitation           Obvious Colour flow doppler regurgitation

&gt; Mild Stenosis                      Clear aliasing through valve

Tricuspid                      &gt; Mild Regurgitation           Jet area &gt;5cm                      Vena contracta Width &gt;7mm

&gt; Mild Stenosis                      Impaired valve opening with clear aliasing

## Mixed Methods Survey

---

Student Number .....

Circle the response that most accurately reflects your response to the following questions:

1. Trans-thoracic echocardiography education has enhanced my understanding of cardiac anatomy and function.

Strongly Disagree      Disagree      Neutral      Agree      Strongly Agree

|  |  |  |  |  |
|--|--|--|--|--|
|  |  |  |  |  |
|--|--|--|--|--|

2. I plan to use TTE in my future clinical practice.

Strongly Disagree      Disagree      Neutral      Agree      Strongly Agree

|  |  |  |  |  |
|--|--|--|--|--|
|  |  |  |  |  |
|--|--|--|--|--|

3. I will benefit from continued ultrasound education throughout my 4 years of medical school.

Strongly Disagree      Disagree      Neutral      Agree      Strongly Agree

|  |  |  |  |  |
|--|--|--|--|--|
|  |  |  |  |  |
|--|--|--|--|--|

4. All medical schools should provide students with education on TTE.

Strongly Disagree      Disagree      Neutral      Agree      Strongly Agree

|  |  |  |  |  |
|--|--|--|--|--|
|  |  |  |  |  |
|--|--|--|--|--|

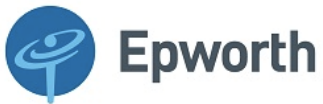

5. My experience with the TTE education was positive

Strongly Disagree      Disagree      Neutral      Agree      Strongly Agree

---

Open ended responses in survey:

6. The Best thing about the FCU education was:

7. The aspect of TTE that could be improved the most was:

8. If I was responsible for designing the TTE training for MD students I would make the following changes for next year:



# Epworth
